# Supplementary material for: Synthesis and Evaluation of the Antibacterial and Antioxidant Activities of Some Novel Chloroquinoline Analogs
Source: Hindawi journal article supplement (doi:10.1155/2021/2408006), 2021-12-30

## Supplementary spectra of the compounds synthesized

The compounds synthesized in the course of this study were characterized using various spectroscopic methods including NMR and UV-Vis. Presented herein are the spectra of the synthesized compounds with the description given above each spectra

Figure 1:  $^1\text{H}$ -NMR spectrum (400 MHz,  $\text{CDCl}_3$  and  $\text{MeOD-}d_4$ ) of 2,7-dichloroquinoline-3-carbaldehyde (**4**).

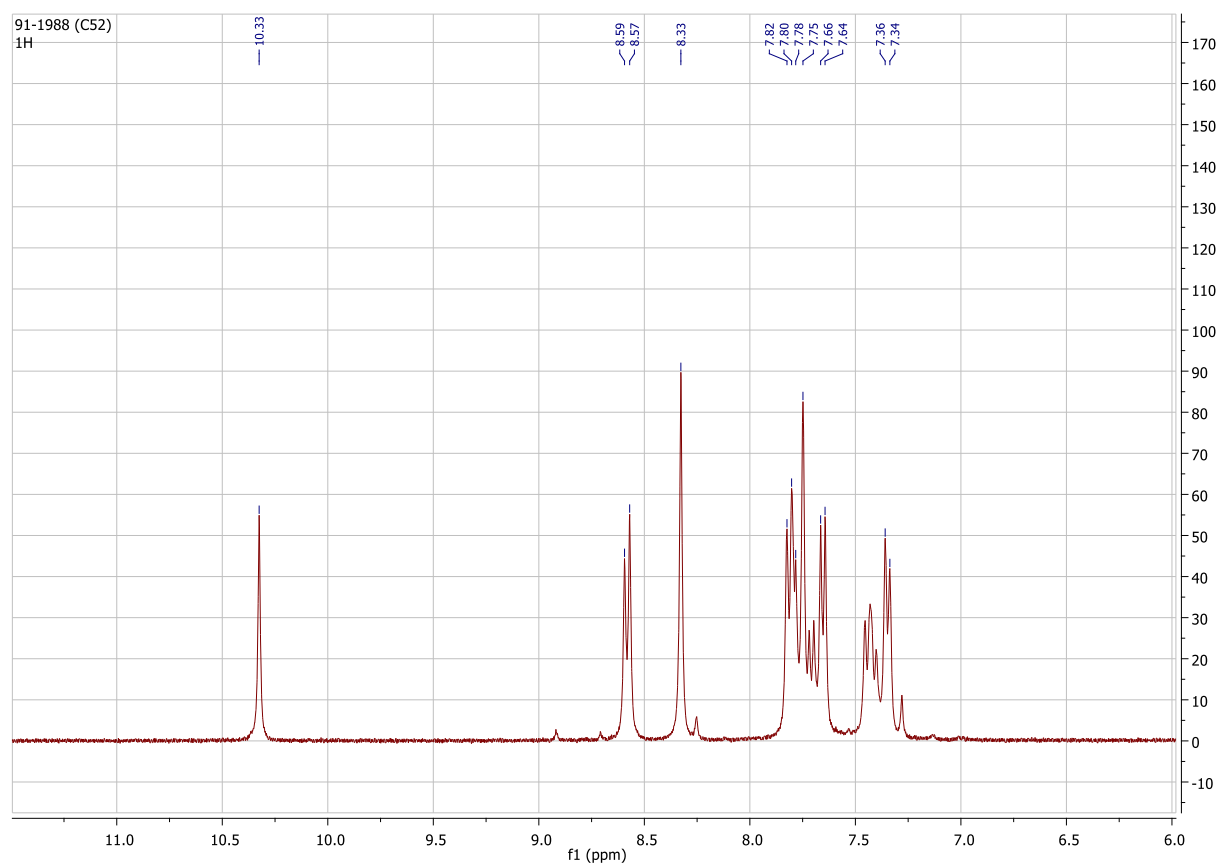

Figure 2:  $^1\text{H}$ -NMR spectrum (400 MHz,  $\text{CDCl}_3$  and  $\text{MeOD-}d_4$ ) of 2,7-dichloroquinoline-3-carbonitrile (**5**).

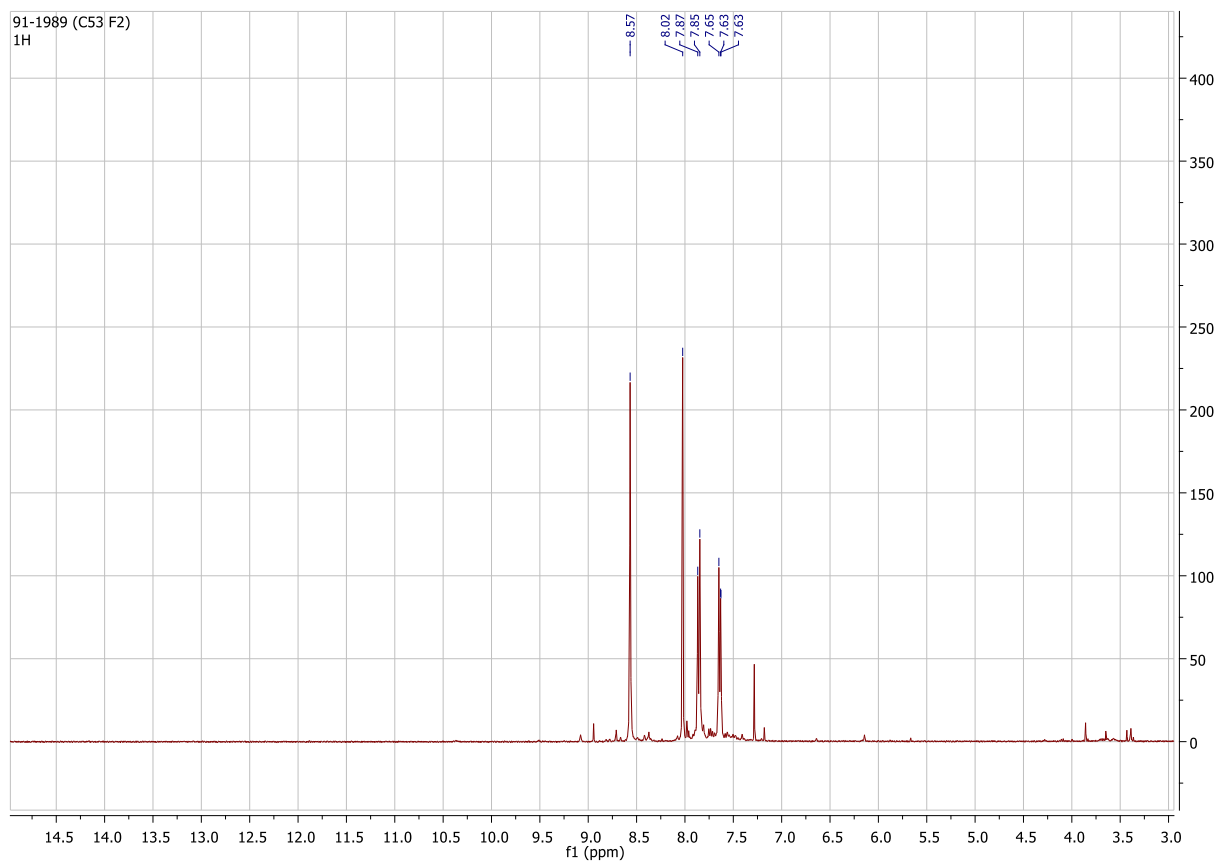

Figure 3:  $^{13}\text{C}$ -NMR spectrum (100 MHz,  $\text{CDCl}_3$  and  $\text{MeOD-}d_4$ ) of 2,7-dichloroquinoline-3-carbonitrile (**5**).

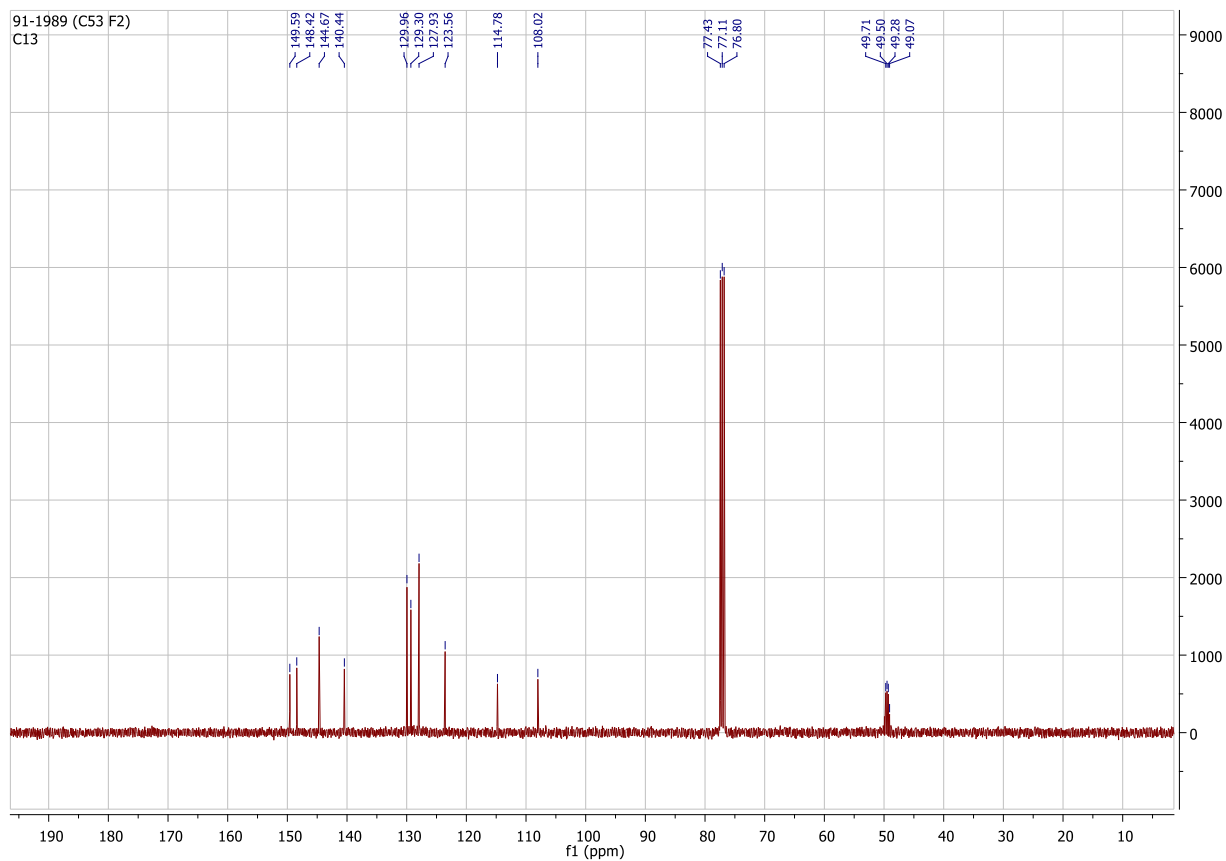

Figure 4:  $^1\text{H}$ -NMR spectrum (400 MHz,  $\text{DMSO-}d_6$ ) of 2,7-dichloroquinoline-3-carbamide (**6**).

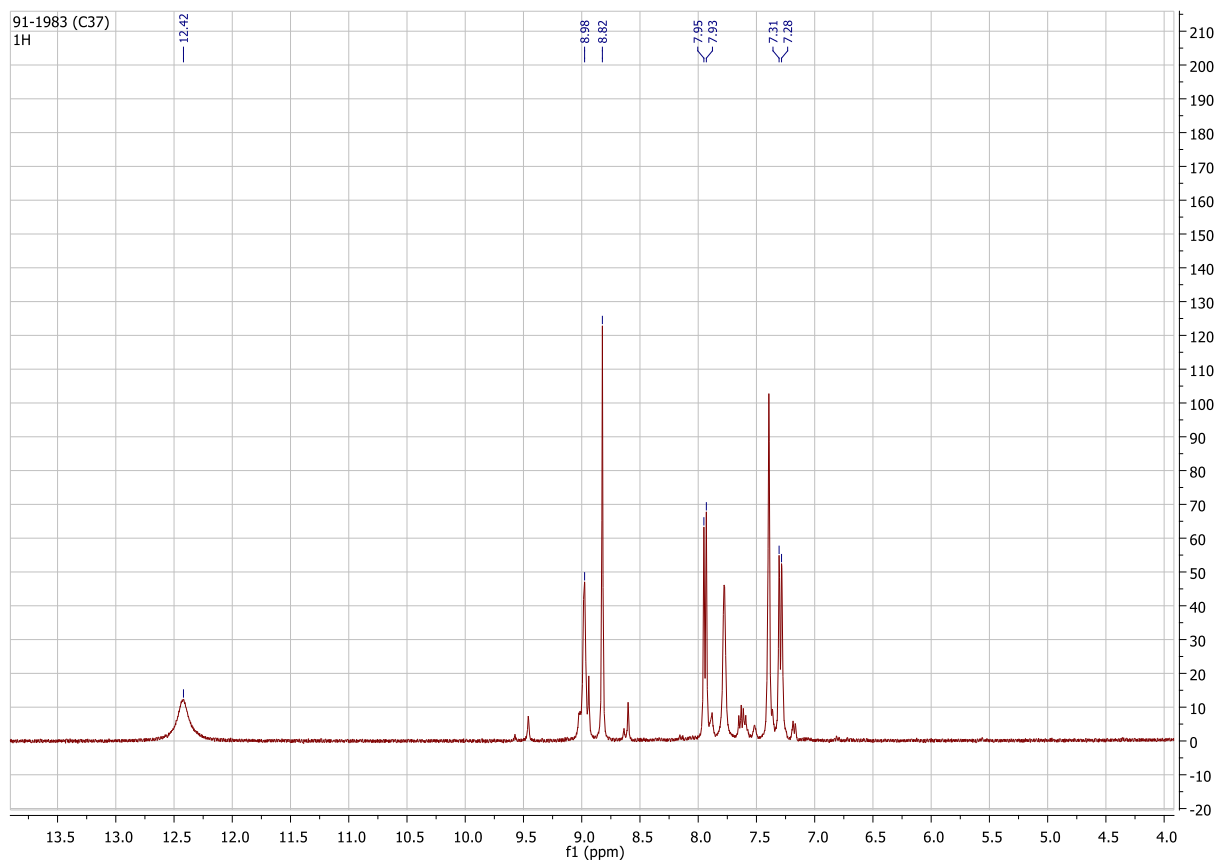

Figure 5:  $^{13}\text{C}$ -NMR spectrum (100 MHz,  $\text{DMSO-}d_6$ ) of 2,7-dichloroquinoline-3-carbamide (**6**).

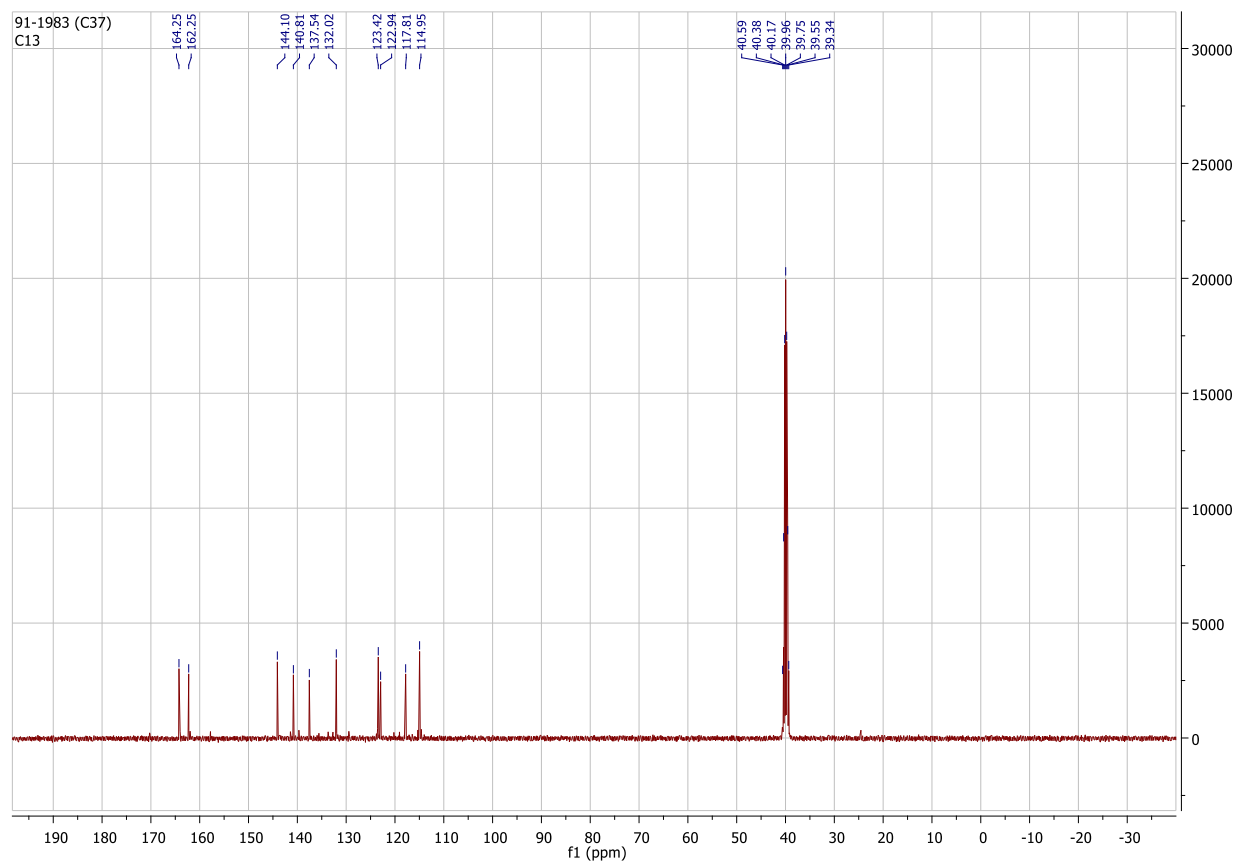

Figure 6:  $^1\text{H-NMR}$  spectrum (400 MHz,  $\text{CDCl}_3$ ) of 7-chloro-2-ethoxyquinoline-3-carbaldehyde (**8**).

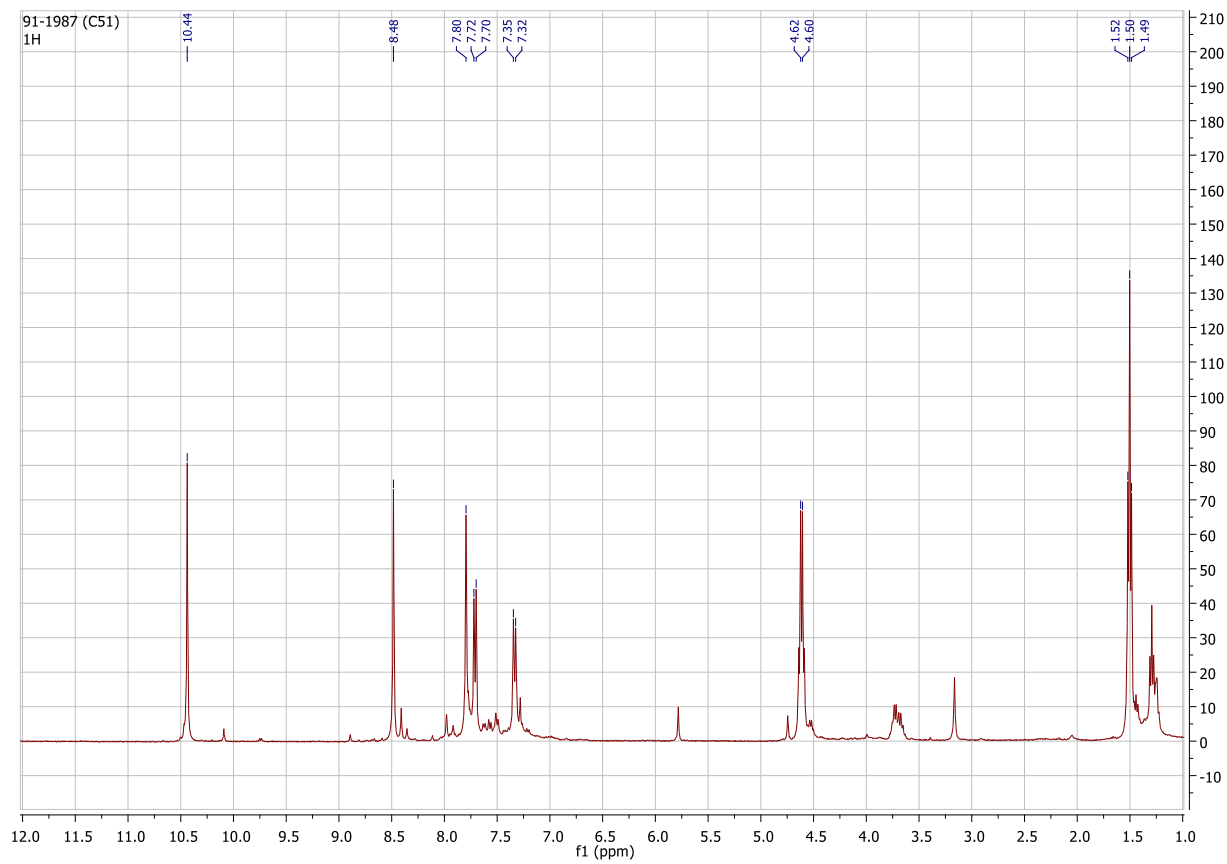

Figure 7:  $^{13}\text{C}$ -NMR spectrum (100 MHz,  $\text{CDCl}_3$ ) of 7-chloro-2-ethoxyquinoline-3-carbaldehyde (8).

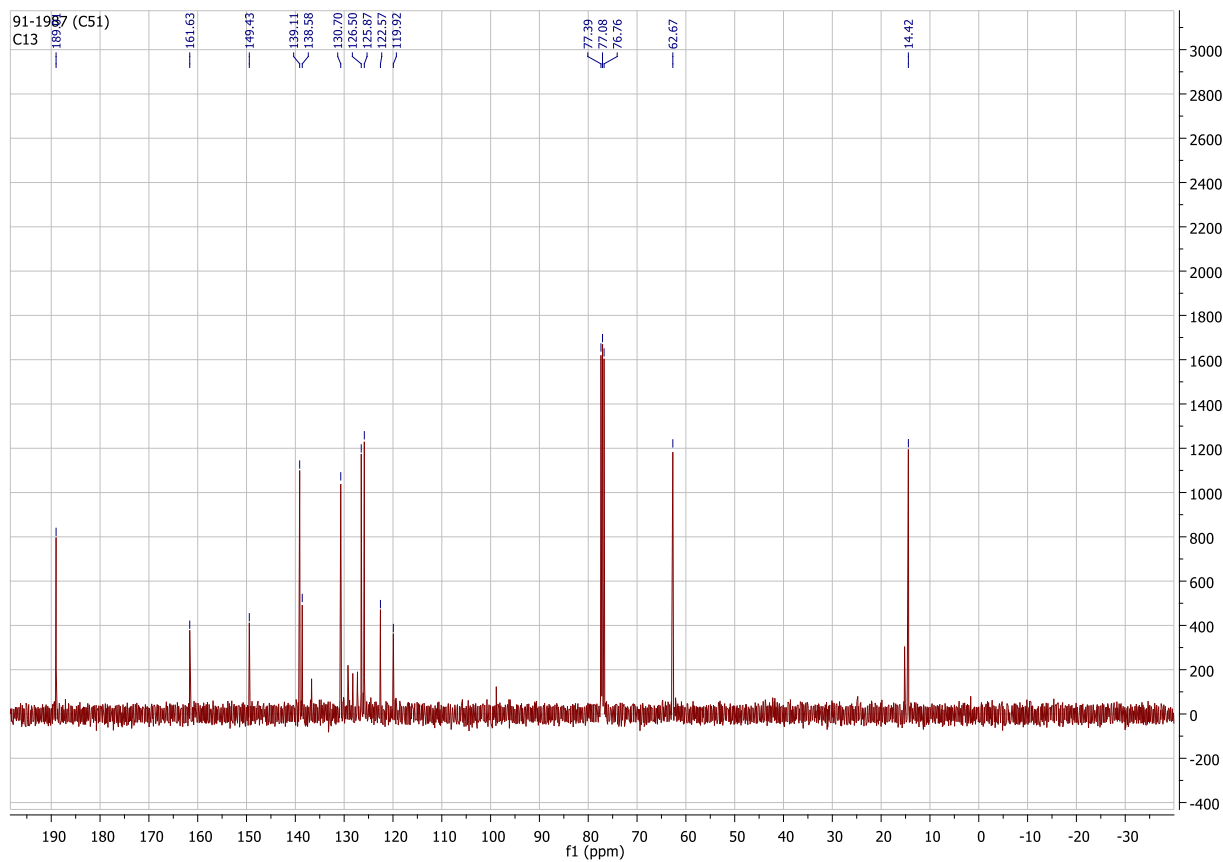

Figure 8:  $^1\text{H-NMR}$  spectrum (400 MHz,  $\text{CDCl}_3$ ) of 2-chloroquinoline-3-carbonitrile (**12**).

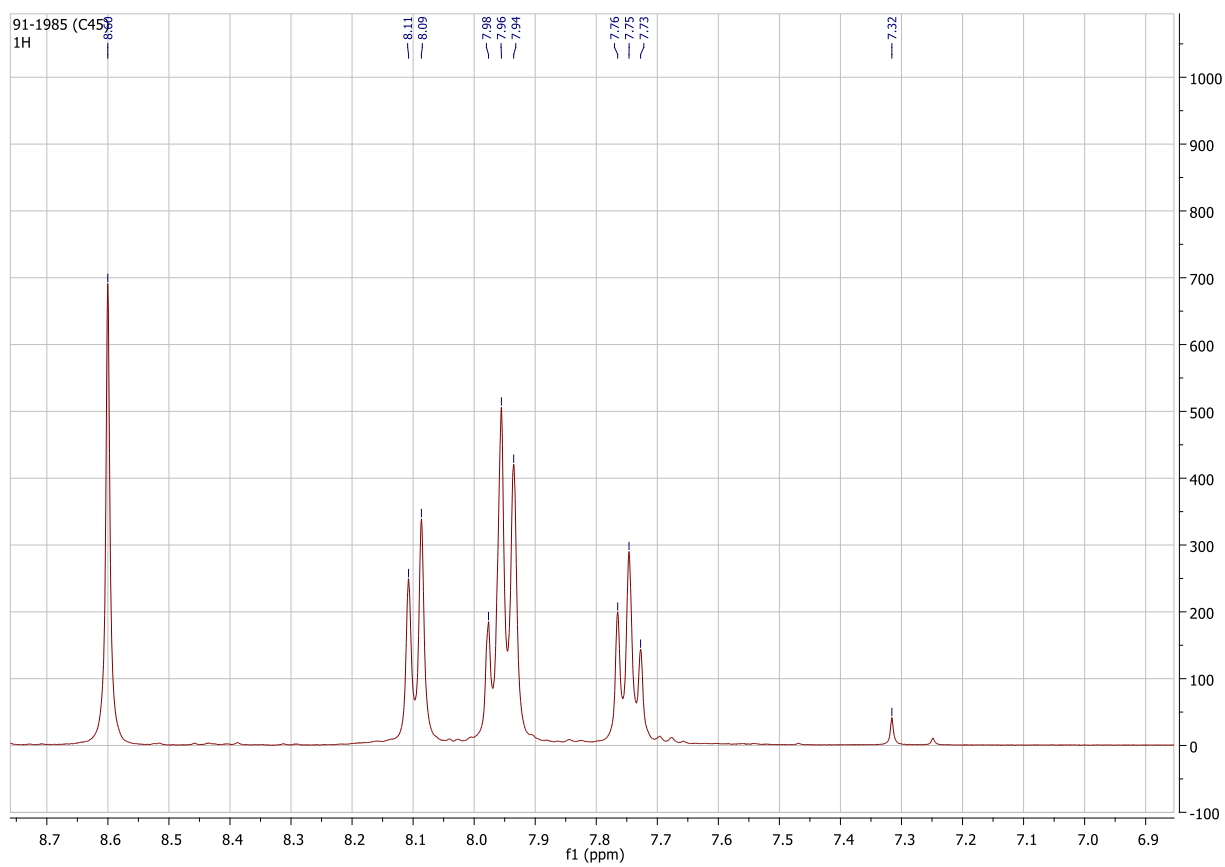



Figure 9:  $^{13}\text{C}$ -NMR spectrum (100 MHz,  $\text{CDCl}_3$ ) of 2-chloroquinoline-3-carbonitrile (**12**).

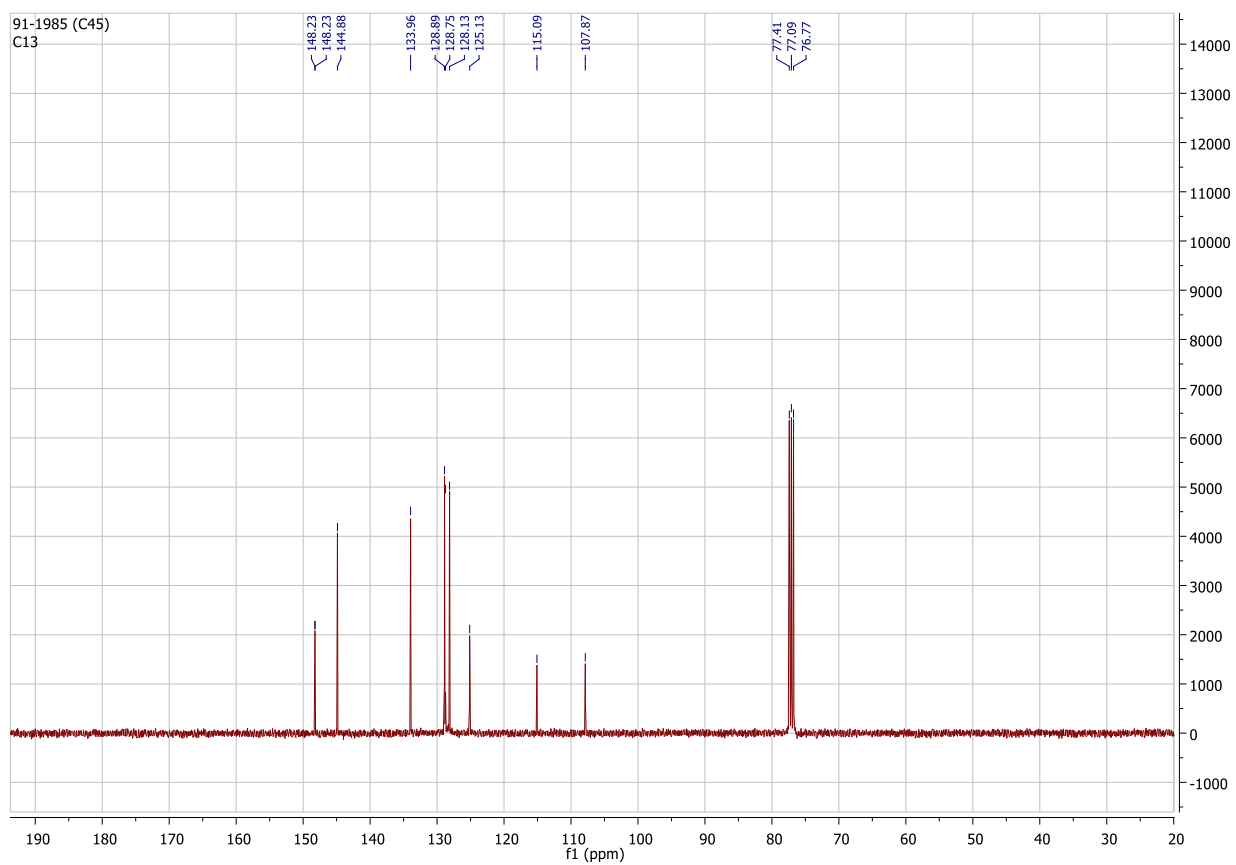

Supplement: f1 [file 2408006.f1.pdf]
